# Supplementary material
Source: PubMed Central journal article supplement (PMC6061716)
Supplement: TX-007-C7TX00300E-s001.pdf [file TX-007-C7TX00300E-s001.pdf]

## Supplementary information

Mechanistic insight to ROS and neutral lipid alteration induced toxicity in human model with fins (*Danio rerio*) by industrially synthesized Titanium dioxide nanoparticles.

Suresh K Verma<sup>a</sup>, Ealisha Jha<sup>b</sup>, Pritam Kumar Panda<sup>a</sup>, Mohana Mukherjee<sup>a</sup>, Arun Thirumurugan<sup>c</sup>, Hardik Makkar<sup>d</sup>, Biswadeep Das<sup>a</sup>, SKS Parashar<sup>e</sup>, Mrutyunjay Suar<sup>a\*</sup>

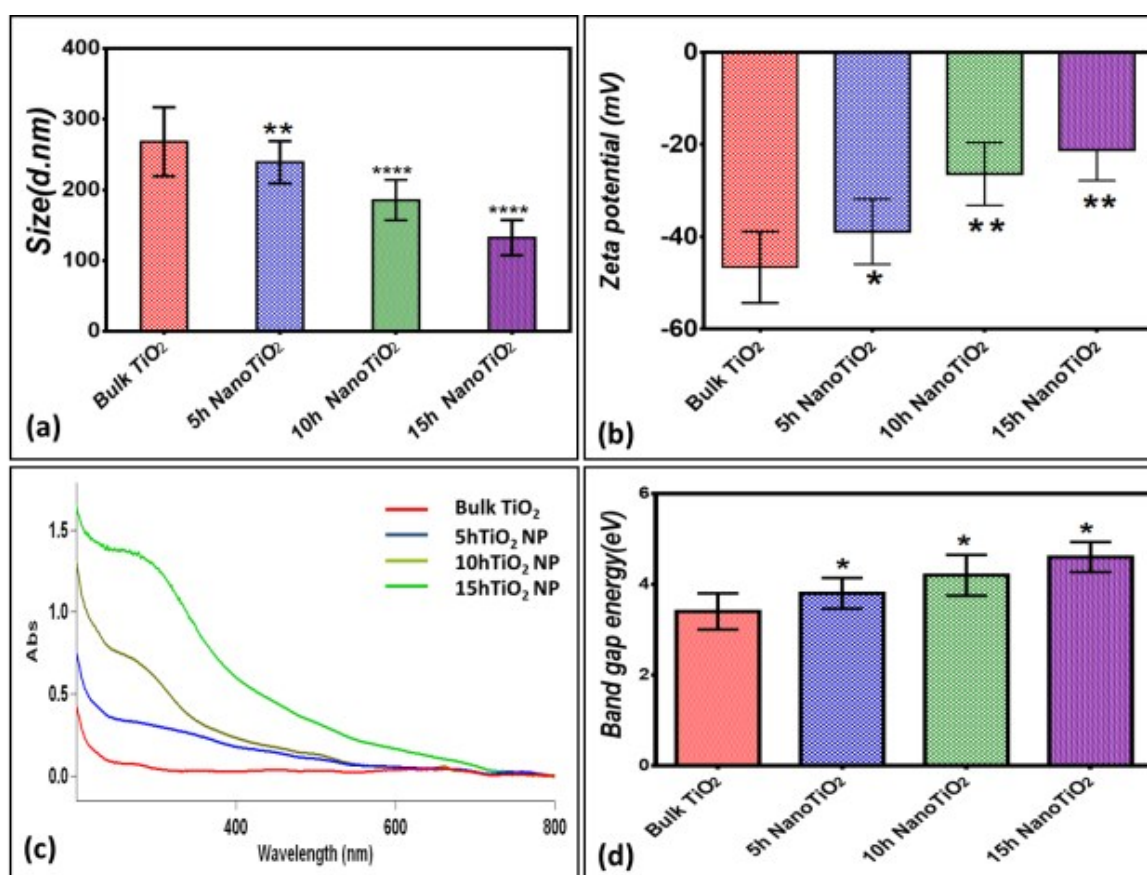

**Figure S1.** Characterization of TiO<sub>2</sub> nanoparticles prepared by HEBM method (a) Hydrodynamic diameter (nm) (b) zeta potential (c) UV-visible spectrum (d) Band energy gap derived from the UV-Visible spectrum. All the parameters were determined by all four types of nanoparticles suspended in aqueous medium. Hydrodynamic diameter and zeta potential data are represented as mean  $\pm$  SD of three independent measurements; \*P<0.05 denotes the significant change from Bulk particles, Number of \* presents the extent of significance

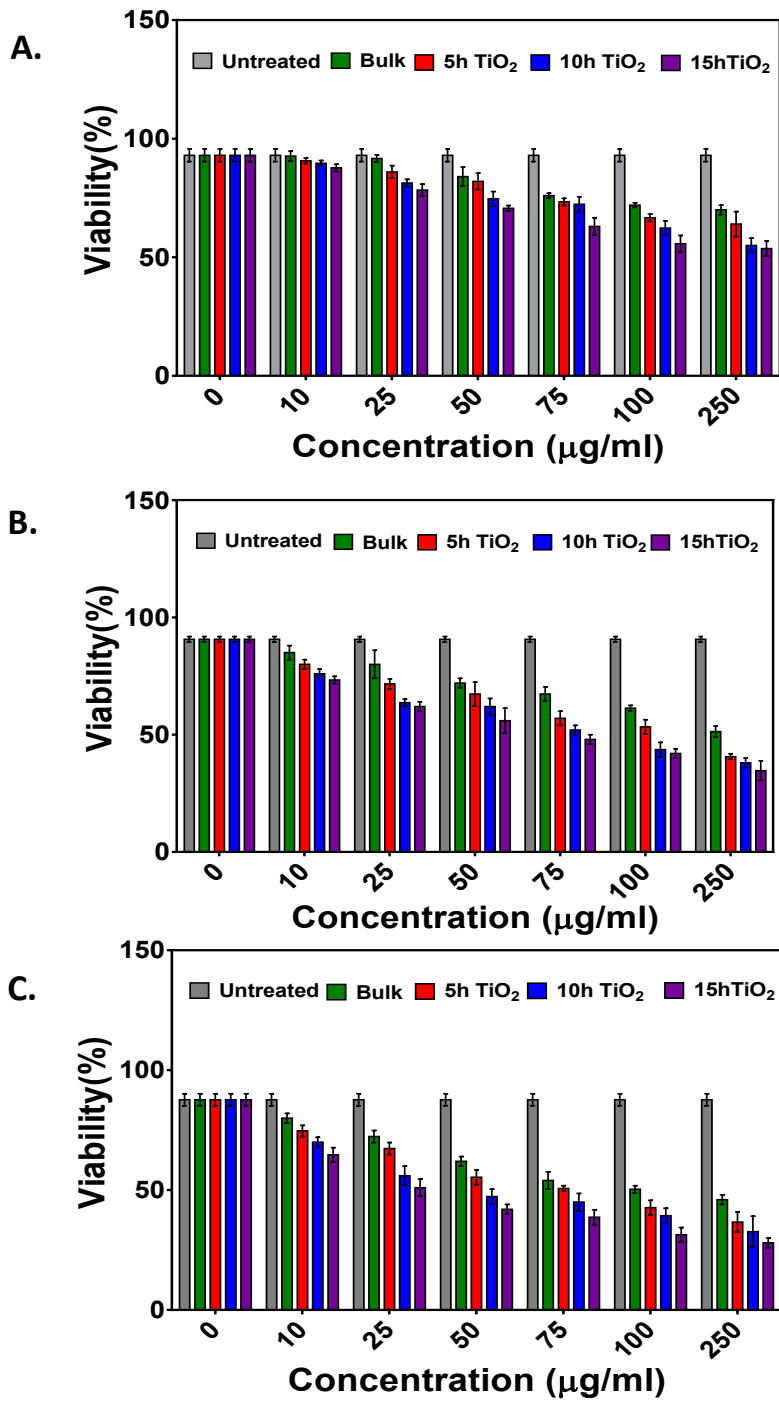

**Figure S2:** Viability changes in Zebrafish embryo treated with 5, 10 and 15h HEBM synthesized TiO<sub>2</sub> nanoparticles at different concentration for (A) 24h (B) 48h and (C) 96h exposure. The values represent mean  $\pm$  SD of three independent experiments. \*P<0.05, denotes significant change from untreated embryos as obtained from ANOVA analysis. Number of \* presents the degree of significance.

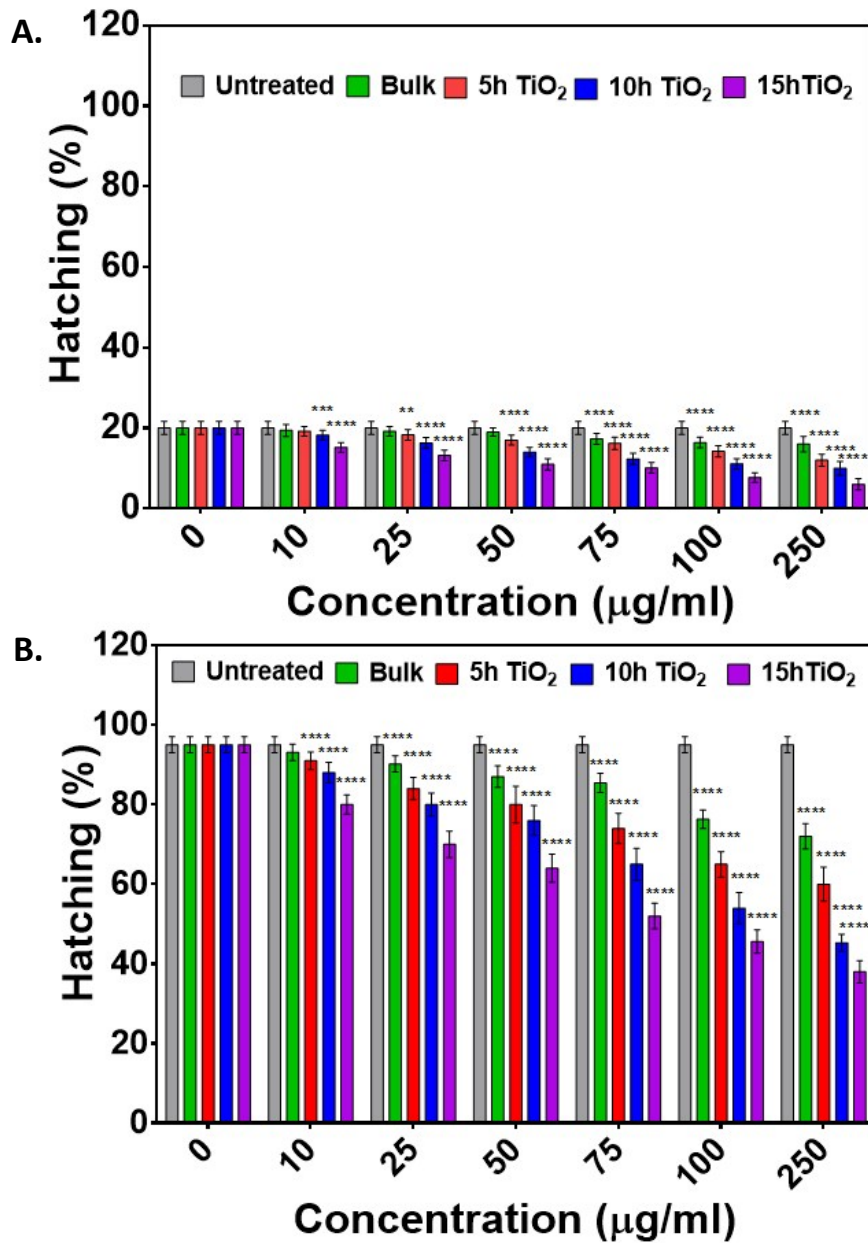

**Figure S3.** Hatching percentage changes in Zebrafish embryo treated with 5, 10 and 15h HEBM synthesized TiO<sub>2</sub> nanoparticles at different concentration for (A) 48h and (B) 96h exposure. The values represent mean± SD of three independent experiments. \*P<0.05, denotes the significant change from untreated embryos as obtained from ANOVA analysis. Number of \* presents the degree of significance.

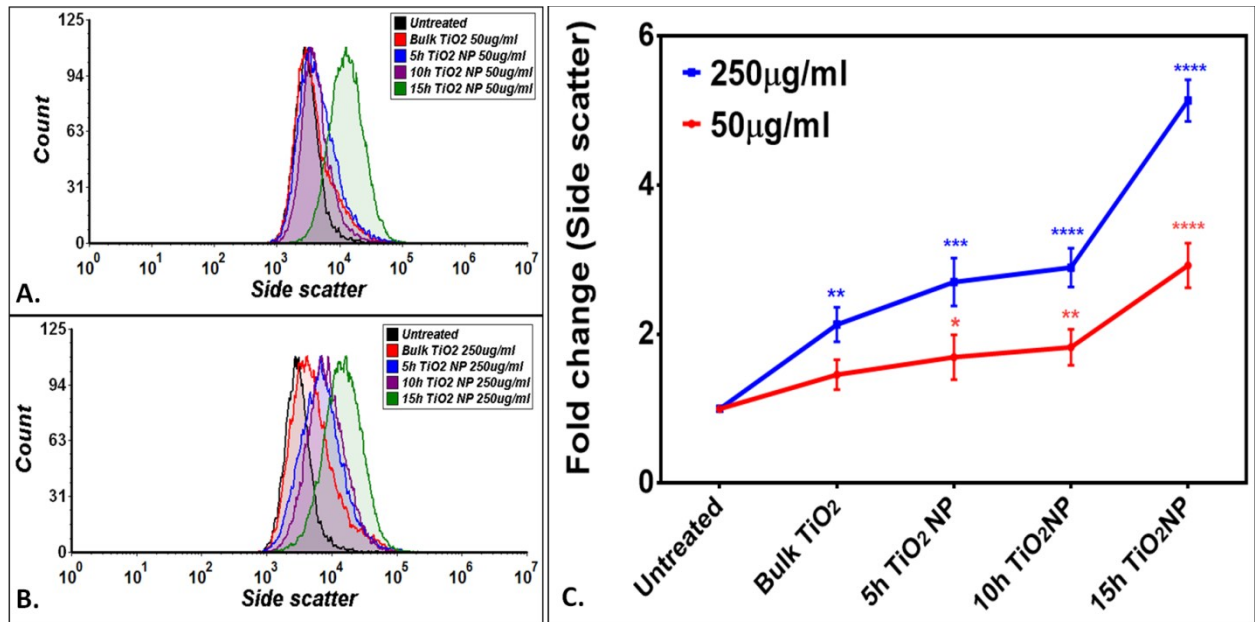

**Figure S4:** Flow cytometry analysis of Bulk and TiO<sub>2</sub> nanoparticles uptake in Zebrafish embryos determined by granularity change (A) Side scatter at 50 µg/ml (B) Side scatter at 250 µg/ml (C) Fold change in side scatter with respect to untreated embryos. The values represent mean ± SD of three independent experiments. \*P < 0.05 denotes the significant change from untreated control, Bulk and 7h exposed embryos as obtained from TWO WAY ANOVA analysis. Number of \* presents the degree of significance.
